# Supplementary material for: Potency and timing of antiviral therapy as determinants of duration of SARS-CoV-2 shedding and intensity of inflammatory response
Source: PubMed Central journal article supplement — Sci Adv. 2020 Nov 20;6(47):eabc7112. doi: 10.1126/sciadv.abc7112 (PMC7679107; doi:10.1126/sciadv.abc7112), 2020-11-20
Supplement: abc7112_1.pdf [file abc7112_1.pdf]

## Supplementary Materials for

### **Potency and timing of antiviral therapy as determinants of duration of SARS-CoV-2 shedding and intensity of inflammatory response**

Ashish Goyal, E. Fabian Cardozo-Ojeda, Joshua T. Schiffer\*

\*Corresponding author. Email: [jschiffe@fredhutch.org](mailto:jschiffe@fredhutch.org)

Published 23 October 2020, *Sci. Adv.* **6**, eabc7112 (2020)  
DOI: 10.1126/sciadv.abc7112

#### **This PDF file includes:**

Figs. S1 to S5  
Tables S1 to S4

## Supplement

**Fig S1. Mathematical model recapitulation of untreated SARS-CoV-2 kinetics with assumed neutralizing antibody effect.** Model fit to individual data. Shapes are individual viral loads and lines are model load projections. S = Singapore; G = Germany; K = South Korea; F = France. Projections are nearly equivalent to those with acquired cytolytic immunity (**Fig 1**).

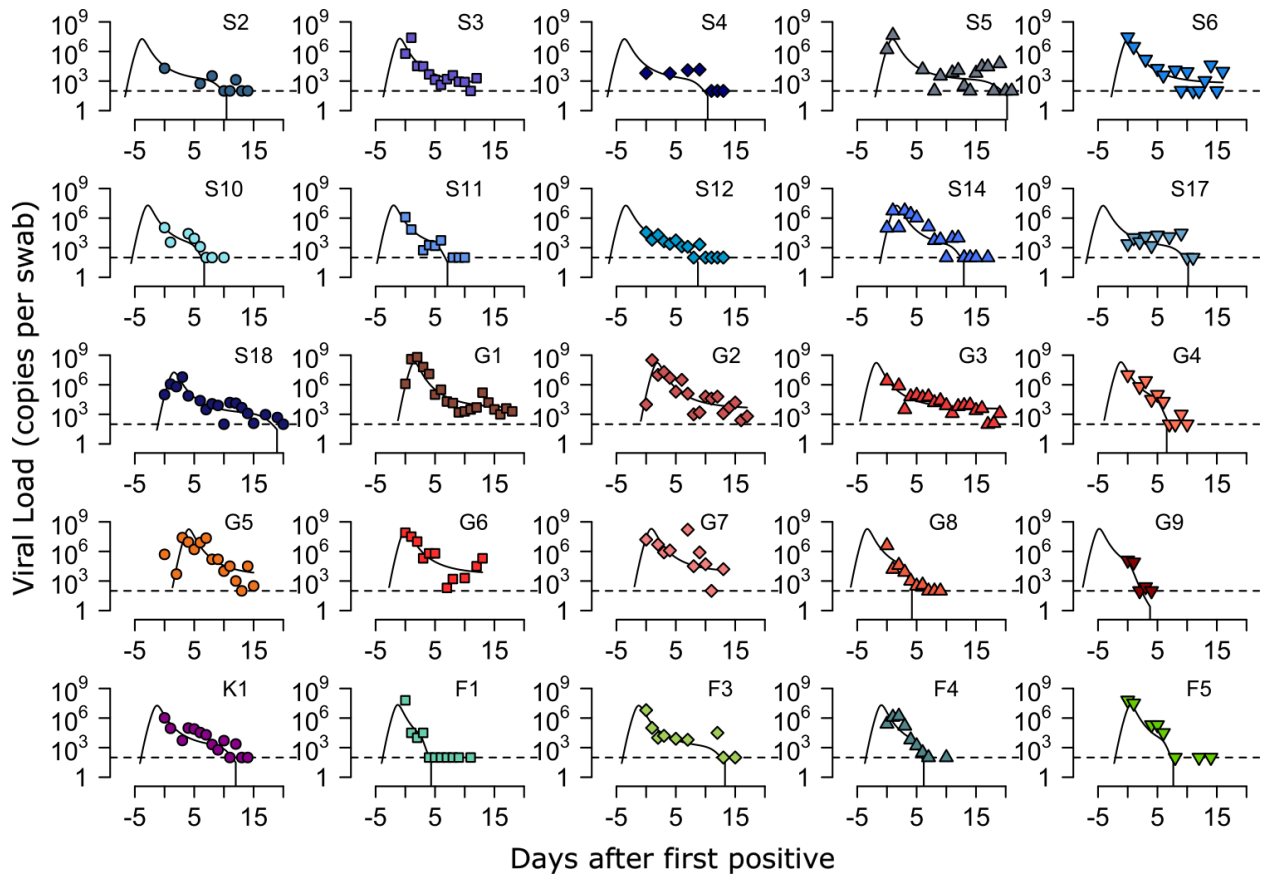

**Fig S2. Treatment projections of a 5-day remdesivir course assuming different potency and timing of treatment.** Each set of simulations is performed under assumptions of high, medium and low potency ( $EC_{50}=0.8, 8$  and  $80 \mu\text{M}$  respectively). Treatment initiation is at timepoints generally consistent with **A.** hospitalization (day 10 after first positive sample), **B.** first symptoms (day 5 after first positive sample), **C.** pre-symptomatic post-peak phase (day 2 after first positive sample) and **D.** pre-symptomatic pre-peak phase (day 0). Overall, early potent treatment limits duration of infection. Prolonged shedding is predicted as a possibility with sub-potent, early initiation of therapy due to inadequate activation of immunity.

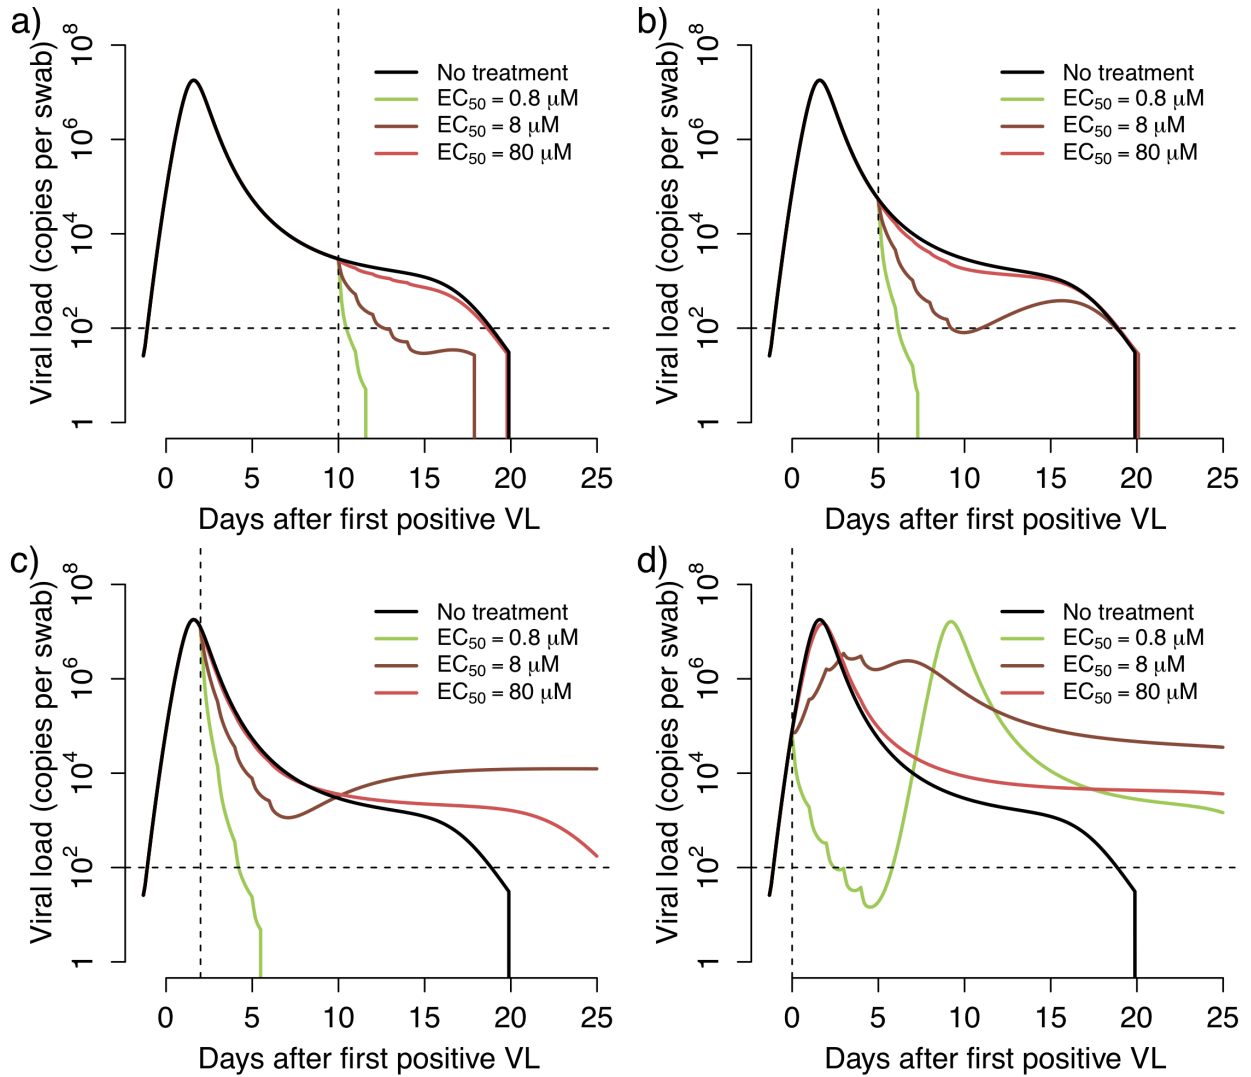

**Fig S3. Projections of remdesivir drug resistance during therapy.** Simulations are with high potency ( $EC_{50}=0.8 \mu\text{M}$ ) and the assumption that mutants confer complete drug resistance. Treatment initiation is at timepoints generally consistent with hospitalization (day 10 after first positive sample), first symptoms (day 5 after first positive sample), pre-symptomatic post-peak phase (day 2 after first positive sample) or pre-symptomatic pre-peak phase (day 0). **A.** Projections of no treatment, treatment with no assumed drug resistance, and treatment with assumed drug resistance. **B.** Projections of assumed drug resistance with trajectories of sensitive strains and single mutants displayed. Prolonged shedding is predicted as a possibility with sub-potent, early initiation of therapy due to inadequate activation of immunity.

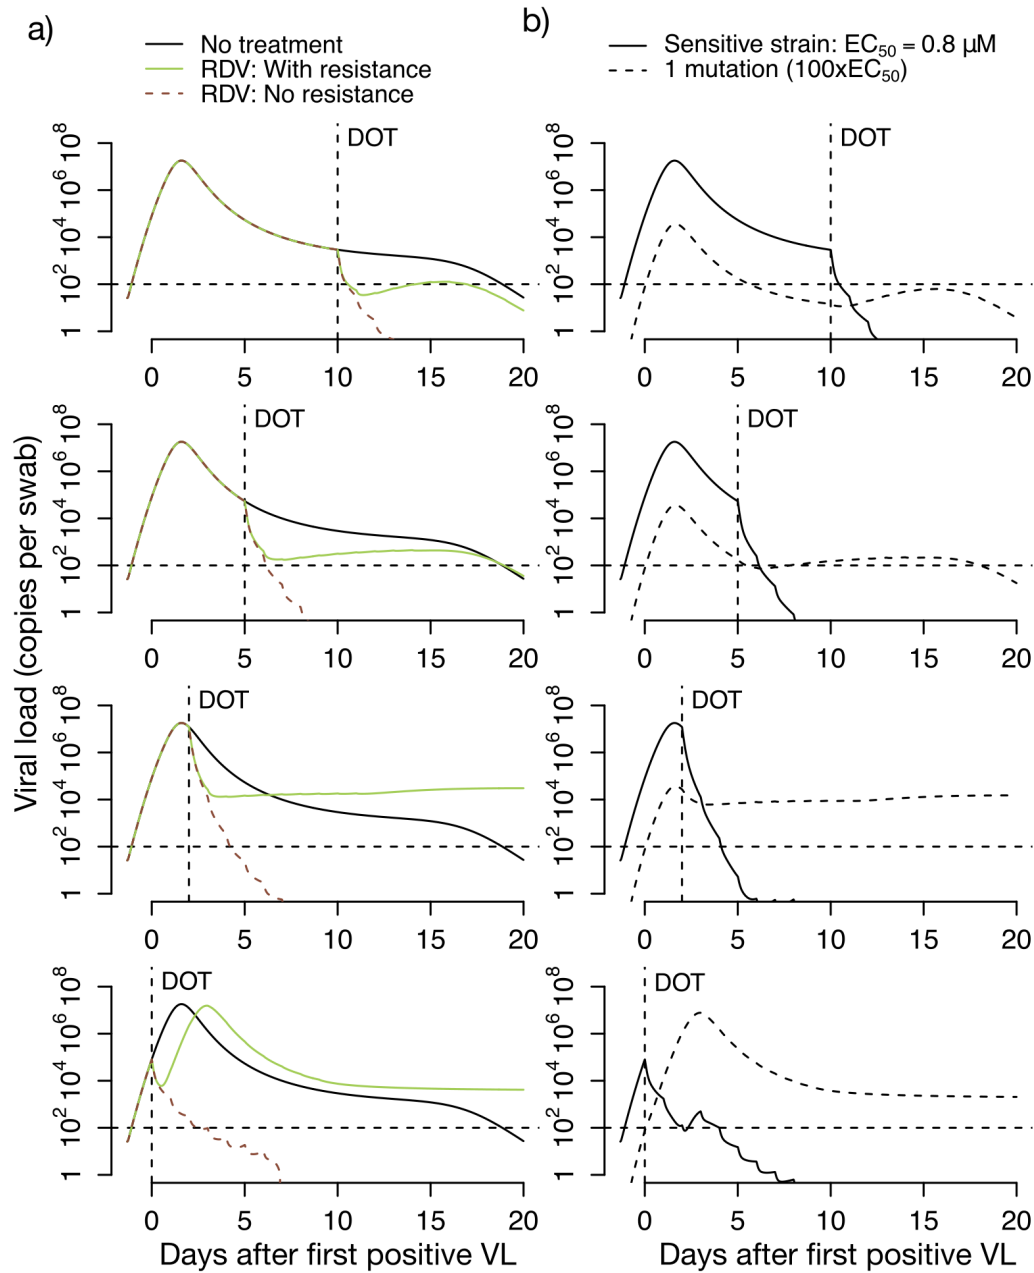

**Fig S4. Treatment projections of selinexor assuming different potency and timing of treatment.** Each set of simulations is performed under assumptions of high, medium and low potency. Treatment initiation is at timepoints generally consistent with **A.** hospitalization (day 10 after first positive sample), **B.** first symptoms (day 5 after first positive sample), **C.** pre-symptomatic post-peak phase (day 2 after first positive sample) and **D.** pre-symptomatic pre-peak phase (day 0). Overall, early potent treatment limits duration of infection. Prolonged shedding is predicted as a possibility with sub-potent, early initiation of therapy due to inadequate activation of immunity.

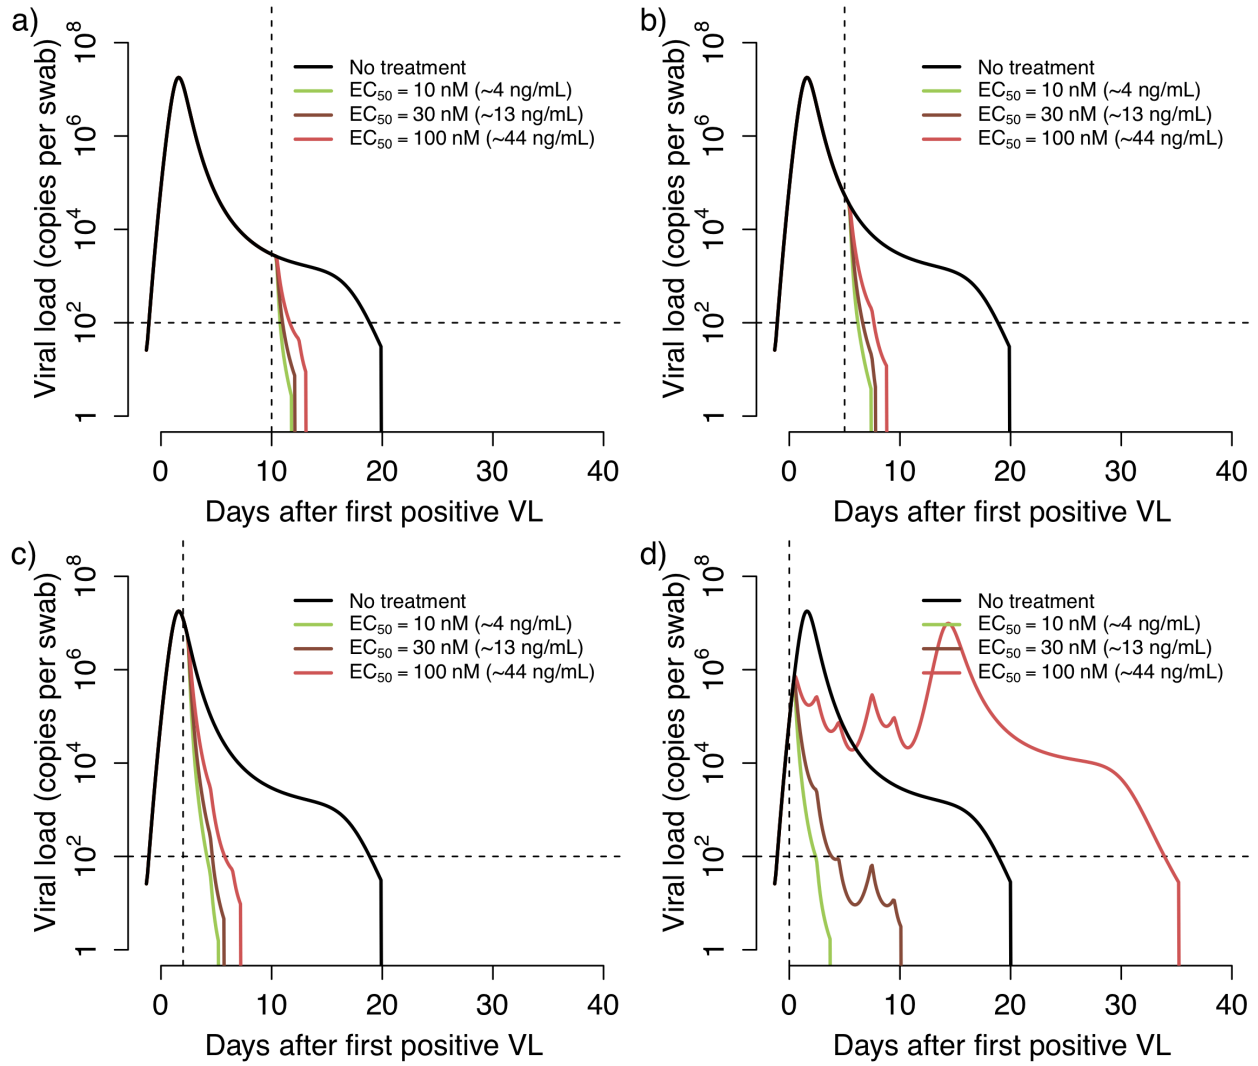

**Fig S5. Treatment projections of broadly neutralizing antibody (bNab) assuming different potency and timing of treatment.** Each set of simulations is performed under assumptions of high, medium and low potency. Treatment initiation is at timepoints generally consistent with **A.** hospitalization (day 10 after first positive sample), **B.** first symptoms (day 5 after first positive sample), **C.** pre-symptomatic post-peak phase (day 2 after first positive sample) and **D.** pre-symptomatic pre-peak phase (day 0). Overall, early potent treatment limits duration of infection. Prolonged shedding is predicted as a possibility with sub-potent, early initiation of therapy due to inadequate activation of immunity. Heatmaps comparing variability in bNAb potency measured by *in vivo* EC50 (x-axis) and timing of treatment initiation (y-axis) for **E.** shedding duration, **F.** viral load area under the curve (AUC) and **G.** extent of T cell response required for viral elimination.

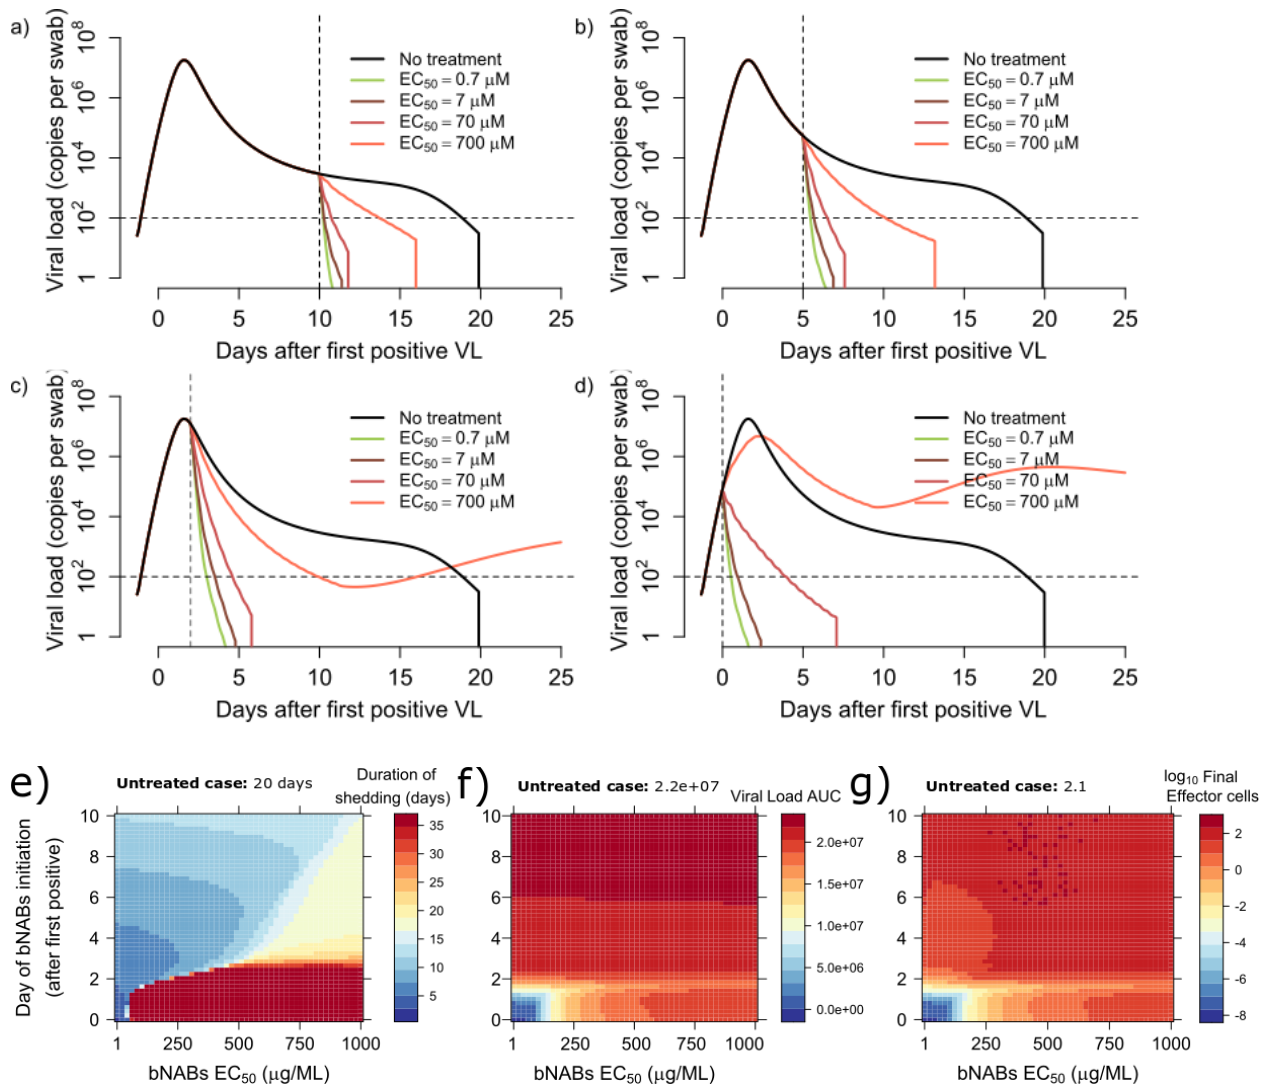

**Table S1: Akaike information criterion (AIC) for multiple instances of our model with different number of the compartments of  $M$  ( $n$ ) and the hill-coefficient associated the effector cell response ( $r$ ).** A lower AIC better supports the combination of parameters for our model. We found that  $n = 2$  and  $r = 10$  is best supported by the data (bold red). We also tried a model with  $n = 0$  (i.e., no effector cell response), and a model with  $n = 0$  and  $k = 0$ . In both cases, we found AIC~945, supporting the choice of our model.

|         | $r = 0.1$ | $r = 1$ | $r = 5$ | $r = 10$     | $r = 15$ |
|---------|-----------|---------|---------|--------------|----------|
| $n = 1$ | 922.8     | 935.4   | 929.7   | 926.5        | 932.2    |
| $n = 2$ | 929.2     | 924.0   | 941.6   | <b>919.9</b> | 925.9    |
| $n = 3$ | 922.8     | 935.4   | 929.7   | 926.5        | 932.2    |
| $n = 4$ | 951.5     | 928.6   | 925.8   | 925.5        | 924.3    |
| $n = 5$ | 950.4     | 930.8   | 929.1   | 923.3        | 922.5    |
| $n = 6$ | NA        | 928.6   | 926.0   | 924.9        | 923.2    |
| $n = 7$ | NA        | 928.3   | 926.4   | 927.8        | 924.8    |

**Table S2. Individual parameter estimates for the best model fits to the viral load data (lowest AIC in Table S1). \* represent parameter value that was not estimated and fixed as a prior during parameter estimation.**

| <b>ID</b>  | $t_{init}$<br>(days<br>before<br>1 <sup>st</sup> +) | $\log_{10}\beta$<br>(virions <sup>-1</sup><br>day <sup>-1</sup> ) | $\delta$<br>(day <sup>-1</sup><br>cells <sup>-k</sup> ) | $k$<br>(-) | $\log_{10}\pi$<br>(log <sub>10</sub> day <sup>-1</sup> ) | $m$<br>(day <sup>-1</sup><br>cells <sup>-1</sup> ) | $\log_{10}\omega$<br>(day <sup>-1</sup><br>cells <sup>-1</sup> ) | $q$<br>(day <sup>-1</sup> ) |
|------------|-----------------------------------------------------|-------------------------------------------------------------------|---------------------------------------------------------|------------|----------------------------------------------------------|----------------------------------------------------|------------------------------------------------------------------|-----------------------------|
| <b>S2</b>  | -6.68                                               | -7.23                                                             | 3.14                                                    | 0.08       | 2.59                                                     | 2.91                                               | -4.56                                                            | 2.4E-05                     |
| <b>S3</b>  | -3.73                                               | -7.22                                                             | 3.12                                                    | 0.08       | 2.60                                                     | 0*                                                 | -4.55                                                            | 2.4E-05                     |
| <b>S4</b>  | -6.56                                               | -7.23                                                             | 3.14                                                    | 0.08       | 2.59                                                     | 3.51                                               | -4.56                                                            | 2.4E-05                     |
| <b>S5</b>  | -2.00                                               | -7.23                                                             | 3.15                                                    | 0.08       | 2.59                                                     | 3.31                                               | -4.56                                                            | 2.4E-05                     |
| <b>S6</b>  | -2.79                                               | -7.23                                                             | 3.12                                                    | 0.08       | 2.60                                                     | 0*                                                 | -4.55                                                            | 2.4E-05                     |
| <b>S10</b> | -5.66                                               | -7.23                                                             | 3.13                                                    | 0.08       | 2.59                                                     | 3.54                                               | -4.55                                                            | 2.4E-05                     |
| <b>S11</b> | -4.80                                               | -7.23                                                             | 3.13                                                    | 0.08       | 2.60                                                     | 3.51                                               | -4.56                                                            | 2.4E-05                     |
| <b>S12</b> | -6.29                                               | -7.23                                                             | 3.14                                                    | 0.08       | 2.59                                                     | 3.26                                               | -4.56                                                            | 2.4E-05                     |
| <b>S14</b> | -1.23                                               | -7.23                                                             | 3.13                                                    | 0.08       | 2.59                                                     | 3.57                                               | -4.55                                                            | 2.4E-05                     |
| <b>S17</b> | -7.06                                               | -7.23                                                             | 3.14                                                    | 0.08       | 2.59                                                     | 3.39                                               | -4.56                                                            | 2.4E-05                     |
| <b>S18</b> | -1.32                                               | -7.23                                                             | 3.15                                                    | 0.08       | 2.59                                                     | 3.20                                               | -4.56                                                            | 2.4E-05                     |
| <b>G1</b>  | -1.27                                               | -7.22                                                             | 3.12                                                    | 0.08       | 2.60                                                     | 0*                                                 | -4.55                                                            | 2.4E-05                     |
| <b>G2</b>  | -0.92                                               | -7.22                                                             | 3.12                                                    | 0.08       | 2.60                                                     | 0*                                                 | -4.55                                                            | 2.4E-05                     |
| <b>G3</b>  | -4.57                                               | -7.22                                                             | 3.12                                                    | 0.08       | 2.60                                                     | 0*                                                 | -4.55                                                            | 2.4E-05                     |
| <b>G4</b>  | -3.97                                               | -7.23                                                             | 3.12                                                    | 0.08       | 2.60                                                     | 3.13                                               | -4.55                                                            | 2.4E-05                     |
| <b>G5</b>  | 1.32                                                | -7.22                                                             | 3.12                                                    | 0.08       | 2.60                                                     | 0*                                                 | -4.55                                                            | 2.4E-05                     |
| <b>G6</b>  | -2.76                                               | -7.23                                                             | 3.13                                                    | 0.08       | 2.60                                                     | 0*                                                 | -4.55                                                            | 2.4E-05                     |
| <b>G7</b>  | -2.00                                               | -7.23                                                             | 3.13                                                    | 0.08       | 2.59                                                     | 0*                                                 | -4.55                                                            | 2.4E-05                     |
| <b>G8</b>  | -6.12                                               | -7.23                                                             | 3.12                                                    | 0.08       | 2.60                                                     | 3.21                                               | -4.55                                                            | 2.4E-05                     |
| <b>G9</b>  | -7.58                                               | -7.22                                                             | 3.11                                                    | 0.08       | 2.60                                                     | 3.72                                               | -4.55                                                            | 2.4E-05                     |
| <b>K1</b>  | -4.17                                               | -7.23                                                             | 3.14                                                    | 0.08       | 2.59                                                     | 3.30                                               | -4.56                                                            | 2.4E-05                     |
| <b>F1</b>  | -4.02                                               | -7.22                                                             | 3.10                                                    | 0.08       | 2.60                                                     | 4.06                                               | -4.55                                                            | 2.4E-05                     |
| <b>F3</b>  | -4.14                                               | -7.23                                                             | 3.14                                                    | 0.08       | 2.59                                                     | 3.36                                               | -4.56                                                            | 2.4E-05                     |
| <b>F4</b>  | -3.74                                               | -7.23                                                             | 3.11                                                    | 0.08       | 2.60                                                     | 3.45                                               | -4.55                                                            | 2.4E-05                     |
| <b>F5</b>  | -2.31                                               | -7.23                                                             | 3.11                                                    | 0.08       | 2.60                                                     | 3.54                                               | -4.55                                                            | 2.4E-05                     |



**Table S3. Individual parameter estimates for pharmacokinetics model of remdesivir.**

| <b>Parameter</b> | <b>Value</b>           |
|------------------|------------------------|
| $k_{pa}$         | 21 day <sup>-1</sup>   |
| $k_c$            | 29 day <sup>-1</sup>   |
| $k_a$            | 1.2 day <sup>-1</sup>  |
| $V_1$            | 2.84 L. Molecular mass |
| $V_2$            | 0.12 L. Molecular mass |

**Table S4. Parameter estimates for pharmacokinetics model of selinexor.**

| <b>Parameter</b> | <b>Value</b>                        |
|------------------|-------------------------------------|
| $k_a$            | 6.1 day <sup>-1</sup>               |
| $k_c$            | 229 day <sup>-1</sup>               |
| $k_{12}$         | $2 \times 10^6$ day <sup>-1</sup>   |
| $k_{21}$         | $1.5 \times 10^4$ day <sup>-1</sup> |
| $k_{13}$         | $6.5 \times 10^2$ day <sup>-1</sup> |
| $k_{31}$         | 0.85 day <sup>-1</sup>              |
| $V_1$            | 0.002 mL                            |
| $V_2$            | 0.5 mL                              |
| $V_3$            | 1.6 mL                              |
